# Supplementary material for: Comparison of commercially available, rapid, point-of-care C-reactive protein assays among children with febrile illness in southwestern Uganda
Source: PubMed Central journal article supplement (PMC10798459; doi:10.1371/journal.pgph.0002727), 2024-01-19
Supplement: pgph.0002727.s001.pdf [file pgph.0002727.s001.pdf]

Study ID (Site - Day - Month - Number): BHC --- --- ---

**SECTION 1: DEMOGRAPHIC INFORMATION**

|                 |                                                                                 |                     |                       |
|-----------------|---------------------------------------------------------------------------------|---------------------|-----------------------|
| <b>Patient:</b> | <b>Sex:</b><br><input type="checkbox"/> Male<br><input type="checkbox"/> Female | <b>Age:</b>         | <b>Home Location:</b> |
|                 |                                                                                 | <b>Village/LC1:</b> | <b>Parish/Ward:</b>   |

Consent Obtained:  Yes  No (Patient excluded, form complete)

**SECTION 2: CLINICAL INFORMATION**

|                                                                                                                                                                                                                                                                                                                                                                                                                                                                                                                                                                                                                                                                                                                                                                                            |                                                                                                                                                                                                                                                                                                                                                                                                                                                                                          |                                                                                                                                                                                                                                                                                                                                                                                                     |
|--------------------------------------------------------------------------------------------------------------------------------------------------------------------------------------------------------------------------------------------------------------------------------------------------------------------------------------------------------------------------------------------------------------------------------------------------------------------------------------------------------------------------------------------------------------------------------------------------------------------------------------------------------------------------------------------------------------------------------------------------------------------------------------------|------------------------------------------------------------------------------------------------------------------------------------------------------------------------------------------------------------------------------------------------------------------------------------------------------------------------------------------------------------------------------------------------------------------------------------------------------------------------------------------|-----------------------------------------------------------------------------------------------------------------------------------------------------------------------------------------------------------------------------------------------------------------------------------------------------------------------------------------------------------------------------------------------------|
| <p><b>Symptoms:</b></p> <p><input type="checkbox"/> fever</p> <p><input type="checkbox"/> skin rash    <input type="checkbox"/> muscle aches</p> <p><input type="checkbox"/> cough        <input type="checkbox"/> fatigue</p> <p><input type="checkbox"/> headache    <input type="checkbox"/> sore throat</p> <p><input type="checkbox"/> runny nose   <input type="checkbox"/> joint pains</p> <p><input type="checkbox"/> diarrhea     <input type="checkbox"/> vomiting</p> <p><input type="checkbox"/> not eating    <input type="checkbox"/> fast breathing</p> <p><input type="checkbox"/> convulsions   <input type="checkbox"/> bleeding</p> <p><input type="checkbox"/> coma         <input type="checkbox"/> chest in-drawing</p> <p><input type="checkbox"/> Other: _____</p> | <p><b>Clinical History:</b></p> <p>Days since first fever: _____</p> <p>Seen at another clinic for this same problem?</p> <p><input type="checkbox"/> Yes<br/><input type="checkbox"/> No</p> <p>Have you taken drugs for malaria in the last two weeks?</p> <p><input type="checkbox"/> Yes<br/><input type="checkbox"/> No</p> <p>Have you taken drugs to treat infection (antibiotics) in the last two weeks?</p> <p><input type="checkbox"/> Yes<br/><input type="checkbox"/> No</p> | <p><b>Past Medical History:</b></p> <p><input type="checkbox"/> Asthma<br/><input type="checkbox"/> Diabetes<br/><input type="checkbox"/> Epilepsy<br/><input type="checkbox"/> Heart problems<br/><input type="checkbox"/> High blood pressure<br/><input type="checkbox"/> ISS<br/><input type="checkbox"/> Malaria<br/><input type="checkbox"/> Tuberculosis</p> <p><b>Other conditions:</b></p> |
|--------------------------------------------------------------------------------------------------------------------------------------------------------------------------------------------------------------------------------------------------------------------------------------------------------------------------------------------------------------------------------------------------------------------------------------------------------------------------------------------------------------------------------------------------------------------------------------------------------------------------------------------------------------------------------------------------------------------------------------------------------------------------------------------|------------------------------------------------------------------------------------------------------------------------------------------------------------------------------------------------------------------------------------------------------------------------------------------------------------------------------------------------------------------------------------------------------------------------------------------------------------------------------------------|-----------------------------------------------------------------------------------------------------------------------------------------------------------------------------------------------------------------------------------------------------------------------------------------------------------------------------------------------------------------------------------------------------|

**SECTION 3: OBJECTIVE DATA**

|                    |           |                   |                   |                    |                                                                                       |
|--------------------|-----------|-------------------|-------------------|--------------------|---------------------------------------------------------------------------------------|
| <u>Temperature</u> | <u>RR</u> | <u>Heart Rate</u> | <u>Oxygen (%)</u> | <u>Weight (kg)</u> | <b>Malaria Test Result:</b> <input type="checkbox"/> POS <input type="checkbox"/> NEG |
|--------------------|-----------|-------------------|-------------------|--------------------|---------------------------------------------------------------------------------------|

**SECTION 4: CONFIRM INCLUSION CRITERIA**

|                           |                                                          |                                                                                                                                |
|---------------------------|----------------------------------------------------------|--------------------------------------------------------------------------------------------------------------------------------|
| <b>Does patient have:</b> | <input type="checkbox"/> History of fever in last 7 days | <i>If the patient meets this criterion, then they are eligible for further testing. <b>Please perform the tests below:</b></i> |
|---------------------------|----------------------------------------------------------|--------------------------------------------------------------------------------------------------------------------------------|

**SECTION 5: RESULTS OF CRP TESTS**

|            |                               |
|------------|-------------------------------|
| Actim CRP: | Afinion CRP                   |
| BTNX CRP:  | SD Biosensor Malaria/CRP Duo: |

**SECTION 6: PATIENT TREATMENT & DISPOSITION**

|                    |                                                 |                                          |                                   |
|--------------------|-------------------------------------------------|------------------------------------------|-----------------------------------|
| <b>Treatment</b>   | <input type="checkbox"/> Antibiotics: _____     | <input type="checkbox"/> Other: _____    |                                   |
|                    | _____                                           | _____                                    |                                   |
| <b>Disposition</b> | <input type="checkbox"/> Discharged from OPD    | <input type="checkbox"/> Admitted to IPD | <input type="checkbox"/> Referred |
|                    | <input type="checkbox"/> Other (specify): _____ |                                          |                                   |
